# Supplementary material
Source: MDPI journal article supplement (https://www.mdpi.com/2077-0472/12/1/6)
Supplement: s1 [file s1]

*Supplementary Materials*

**Assessment of drought tolerance of *Miscanthus* genotypes to use in  
bioenergy crop development through dry-down treatment and fixed-soil-  
moisture-content techniques**

Tzu-Ya Weng, Taiken Nakashima, Antonio Villanueva-Morales, J. Ryan Stewart, Erik J. Sacks<sup>5</sup>,

Toshihiko Yamada\*

**\*Correspondence:**

Toshihiko Yamada

[yamada@fsc.hokudai.ac.jp](mailto:yamada@fsc.hokudai.ac.jp)

**SUPPLEMENTARY DATA**

Supplementary Table S1, S2, S3, S4, &S5; Supplementary Figure S1 &S2

**Supplemental Table S1.** Detailed information of 29 *Miscanthus* genotypes used for the evaluation of low-water-adaptability capacity in *Miscanthus* spp., including entry number, species, origin location, and genetic groups background. Some information is not available for some genotypes

| Species                  | Accession    | Genetic clusters†                                   | Type | Country of origin | Cultivar/ | Place    | Latitude | Longitude |
|--------------------------|--------------|-----------------------------------------------------|------|-------------------|-----------|----------|----------|-----------|
| Strain name              |              |                                                     |      |                   |           |          |          |           |
| <i>M. sacchariflorus</i> | UI11-00033   | S Japan 4x Msa                                      | Wild | Japan             |           | Gifu     |          |           |
| <i>M. sacchariflorus</i> | JPN-2011-010 | N Japan 4x Msa                                      | Wild | Japan             |           | Hokkaido | 42.61618 | 141.8116  |
| <i>M. sacchariflorus</i> | JPN-2011-004 | S Japan 4x Msa                                      | Wild | Japan             |           | Gifu     | 36.16943 | 137.3095  |
| <i>M. sacchariflorus</i> | JPN-2011-006 | S Japan 4x Msa                                      | Wild | Japan             |           | Gifu     | 35.3246  | 136.693   |
| <i>M. sacchariflorus</i> | JPN-2010-005 | N Japan 4x Msa                                      | Wild | Japan             |           | Hokkaido | 42.61475 | 141.8167  |
| <i>M. sacchariflorus</i> | UI11-00031   | Yangtze diploids (ssp. <i>lutarioriparius</i> ) Msa | Wild | China             |           |          |          |           |

|                          |                     |                      |          |         |                |            |          |
|--------------------------|---------------------|----------------------|----------|---------|----------------|------------|----------|
| <i>M. sacchariflorus</i> | RU2012-169          | NEChina/Korea/Russia | Wild     | Russia  | Primorsky Krai | 45.34596   | 133.5559 |
|                          |                     | diploids Msa         |          |         |                |            |          |
| <i>M. sacchariflorus</i> | RU2012-183          | NEChina/Korea/Russia | Wild     | Russia  |                | 43.75422   | 132.0818 |
|                          |                     | diploids Msa         |          |         |                |            |          |
| <i>M. sacchariflorus</i> | RU2012-056.1WD (4x) | NChina/Korea/Russia  | Wild     | Russia  |                | 48.82444   | 135.948  |
|                          |                     | tetraploids Msa      |          |         |                |            |          |
| <i>M. sacchariflorus</i> | JM11-006            | S Japan 4x Msa       | Wild     | Japan   | Yamaguchi      | 34.1986667 | 131.2806 |
| <i>M. sacchariflorus</i> | UI10-00008          | NEChina/Korea/Russia | Cultivar | Unknown | Hortico        |            |          |
|                          |                     | diploids Msa         |          |         |                |            |          |
| <i>M. sacchariflorus</i> | RU2012-141          | NEChina/Korea/Russia | Wild     | Russia  |                | 47.50762   | 134.7411 |
|                          |                     | diploids Msa         |          |         |                |            |          |

|                                            |            |                     |          |       |         |            |          |
|--------------------------------------------|------------|---------------------|----------|-------|---------|------------|----------|
| <i>M. sinensis</i>                         | PMS-164    | Yangtze-Qinling Msi | Wild     | China | Hebei   | 37.3400167 | 114.281  |
| <i>M. sinensis</i>                         | PMS-007    | Yangtze-Qinling Msi | Wild     | China | Hubei   | 30.79765   | 110.2624 |
| <i>M. sinensis</i>                         | UI10-00092 | C Japan Msi         | Cultivar |       |         |            |          |
| <i>M. sinensis</i>                         | PMS-586    | Sichuan Msi         | Wild     | China | Guizhou | 27.0010333 | 108.699  |
| <i>M. sinensis</i>                         | UI10-00024 | S Japan Msi         | Cultivar |       |         |            |          |
| <i>M. sinensis</i> var. <i>condensatus</i> | UI10-00015 | C Japan Msi         | Cultivar |       |         |            |          |
| <i>M. sinensis</i>                         | PMS-014    | Sichuan Msi         | Wild     | China | Hubei   | 29.6570167 | 109.1195 |
| <i>M. sinensis</i>                         | UI10-00097 | S Japan Msi         | Cultivar |       |         |            |          |
| <i>M. sinensis</i>                         | UI10-00088 | C Japan Msi         | Cultivar |       |         |            |          |
|                                            |            |                     |          |       | (Silver |            |          |
|                                            |            |                     |          |       | Tower)  |            |          |

|                      |            |                     |          |                  |  |             |            |          |
|----------------------|------------|---------------------|----------|------------------|--|-------------|------------|----------|
| <i>M. sinensis</i>   | PMS-347    | SE China Msi        | Wild     | China            |  | Guangdong   | 24.1679833 | 115.8839 |
| <i>M. sinensis</i>   | UI10-00020 | S Japan Msi         | Cultivar |                  |  | Adagio      |            |          |
| <i>M. sinensis</i>   | PMS-285    | Yangtze-Qinling Msi | Wild     | China            |  | Anhui       | 29.64345   | 118.1584 |
| <i>M. sinensis</i>   | UI10-00100 | S Japan Msi         | Cultivar |                  |  | Yaku Jima   |            |          |
| <i>M. sinensis</i>   | UI10-00053 | S Japan Msi         | Cultivar |                  |  | Grosse      |            |          |
|                      |            |                     |          |                  |  | Fontaine    |            |          |
| <i>M. sinensis</i>   | UI10-00080 | C Japan Msi         | Cultivar |                  |  | Roland      |            |          |
| <i>M. sinensis</i>   | UI10-00048 | S Japan Msi         | Cultivar |                  |  | Gracillimus |            |          |
| <i>M. floridulus</i> | PI417947   | SE China Msi        | Wild     | Papua New Guinea |  | NG77-022    |            |          |

---

†According to Clark *et al.* (2014) and Clark *et al.* (2019)

**Supplemental Table S2-1.** Least squares means of drought stress index (DSI) values of chlorophyll fluorescence ( $\phi$ PSII) of *Miscanthus* genotypes in a screening experiment at Brigham Young University, Provo, Utah, USA

| Species                  | Accession  | Stress level† | DSI of $\phi$ PSII |
|--------------------------|------------|---------------|--------------------|
| <i>M. sinensis</i>       | PMS-007    | 1             | 102.89 A‡          |
| <i>M. sinensis</i>       | UI10-00088 | 1             | 84.10 AB           |
| <i>M. sinensis</i>       | PMS-285    | 1             | 75.91 AB           |
| <i>M. sinensis</i>       | PMS-164    | 2             | 67.81 AB           |
| <i>M. sacchariflorus</i> | UI11-00031 | 1             | 61.13 AB           |
| <i>M. floridulus</i>     | PI417947   | 1             | 59.20 AB           |
| <i>M. sinensis</i>       | PMS-347    | 1             | 52.71 AB           |
| <i>M. sinensis</i>       | PMS-014    | 1             | 52.58 AB           |
| <i>M. floridulus</i>     | PI417947   | 2             | 51.15 AB           |
| <i>M. sinensis</i>       | PMS-007    | 2             | 47.43 AB           |
| <i>M. sinensis</i>       | PMS-285    | 2             | 44.68 AB           |
| <i>M. sinensis</i>       | PMS-164    | 1             | 42.87 AB           |
| <i>M. sacchariflorus</i> | UI11-00031 | 2             | 33.91 AB           |
| <i>M. sinensis</i>       | PMS-586    | 1             | 32.91 AB           |
| <i>M. sinensis</i>       | UI10-00088 | 2             | 16.86 AB           |
| <i>M. sinensis</i>       | PMS-014    | 2             | 0.019 AB           |

|                    |         |   |          |
|--------------------|---------|---|----------|
| <i>M. sinensis</i> | PMS-586 | 2 | -7.23 AB |
| <i>M. sinensis</i> | PMS-347 | 2 | -17.19 B |

---

†Stress level 1 represents the slight drought stress treatment and stress level 2 represents the severe drought stress treatment.

‡Least squares means with the same letter are not significantly different ( $p < 0.05$ ).

**Supplemental Table S2-2.** Least squares means of drought stress index (DSI) values of chlorophyll fluorescence ( $\phi$ PSII) of *Miscanthus* genotypes in a precise-comparison experiment at Hokkaido University, Sapporo, Japan

| Species                                    | Accession    | Stress level† | DSI of $\phi$ PSII |
|--------------------------------------------|--------------|---------------|--------------------|
| <i>M. sinensis</i>                         | PMS-285      | 2             | 163.24 A‡          |
| <i>M. sinensis</i>                         | UI10-00024   | 2             | 114.06 AB          |
| <i>M. sinensis</i>                         | PMS-164      | 2             | 98.95 ABC          |
| <i>M. sinensis</i>                         | PMS-285      | 1             | 94.04 ABC          |
| <i>M. sacchariflorus</i>                   | JPN-2011-004 | 2             | 80.80 ABC          |
| <i>M. sinensis</i>                         | PMS-347      | 2             | 80.06 ABC          |
| <i>M. sinensis</i>                         | UI10-00024   | 1             | 74.97 BC           |
| <i>M. sinensis</i>                         | PMS-007      | 1             | 71.52 BC           |
| <i>M. sinensis</i>                         | PMS-007      | 2             | 68.85 BC           |
| <i>M. sacchariflorus</i>                   | UI10-00008   | 1             | 67.99 BC           |
| <i>M. sinensis</i>                         | UI10-00020   | 2             | 65.80 BC           |
| <i>M. sinensis</i>                         | PMS-164      | 1             | 63.64 BC           |
| <i>M. sinensis</i>                         | UI10-00020   | 1             | 62.51 BC           |
| <i>M. sacchariflorus</i>                   | UI11-00033   | 2             | 61.95 BC           |
| <i>M. sacchariflorus</i>                   | UI10-00008   | 2             | 53.70 BC           |
| <i>M. sacchariflorus</i>                   | JPN-2011-004 | 1             | 53.15 BC           |
| <i>M. sinensis</i> var. <i>condensatus</i> | UI10-00015   | 2             | 51.87 BC           |



|                                     |            |   |          |
|-------------------------------------|------------|---|----------|
| <i>M. sinensis</i>                  | PMS-347    | 1 | 47.97 BC |
| <i>M. sacchariflorus</i>            | UI11-00033 | 1 | 39.22 C  |
| <i>M. sinensis var. condensatus</i> | UI10-00015 | 1 | 37.81 C  |

---

†Stress level 1 represents the slight drought stress treatment and stress level 2 represents the severe drought stress treatment.

‡Least squares means with the same letter are not significantly different ( $p < 0.05$ ).

**Supplemental Table S3-1.** Least squares means of drought stress index (DSI) values of photosynthetic rate (Pn) of *Miscanthus* genotypes in a screening experiment at Brigham Young University, Provo, Utah, USA

| Species                  | Accession  | Stress level† | DSI of Pn |
|--------------------------|------------|---------------|-----------|
| <i>M. sinensis</i>       | PMS-164    | 2             | 124.48 A‡ |
| <i>M. sinensis</i>       | UI10-00088 | 1             | 99.62 A   |
| <i>M. sinensis</i>       | PMS-007    | 1             | 94.39 A   |
| <i>M. floridulus</i>     | PI417947   | 1             | 89.04 A   |
| <i>M. sinensis</i>       | PMS-285    | 1             | 86.75 A   |
| <i>M. floridulus</i>     | PI417947   | 2             | 82.02 A   |
| <i>M. sinensis</i>       | PMS-285    | 2             | 71.93 A   |
| <i>M. sinensis</i>       | PMS-007    | 2             | 66.02 A   |
| <i>M. sacchariflorus</i> | UI11-00031 | 1             | 63.54 A   |
| <i>M. sinensis</i>       | PMS-014    | 1             | 56.38 A   |
| <i>M. sinensis</i>       | PMS-164    | 1             | 42.95 A   |
| <i>M. sinensis</i>       | PMS-586    | 1             | 39.28 A   |
| <i>M. sinensis</i>       | PMS-347    | 1             | 36.13 A   |
| <i>M. sacchariflorus</i> | UI11-00031 | 2             | 35.86 A   |
| <i>M. sinensis</i>       | UI10-00088 | 2             | 21.59 A   |
| <i>M. sinensis</i>       | PMS-586    | 2             | 3.16 A    |
| <i>M. sinensis</i>       | PMS-014    | 2             | -0.86 A   |

†Stress level 1 represents the slight drought stress treatment and stress level 2 represents the severe drought stress treatment.

‡Least squares means with the same letter are not significantly different ( $p < 0.05$ ).

**Supplemental Table S3-2.** Least squares means of drought stress index (DSI) values of photosynthetic rate (Pn) of *Miscanthus* genotypes in a precise-comparison experiment at Hokkaido University, Sapporo, Japan

| Species                                    | Accession    | Stress level† | DSI of Pn  |
|--------------------------------------------|--------------|---------------|------------|
| <i>M. sinensis</i>                         | PMS-007      | 1             | 77.31 A‡   |
| <i>M. sacchariflorus</i>                   | UI11-00033   | 2             | 76.05 A    |
| <i>M. sinensis</i> var. <i>condensatus</i> | UI10-00015   | 1             | 75.19 A    |
| <i>M. sinensis</i> var. <i>condensatus</i> | UI10-00015   | 2             | 66.66 AB   |
| <i>M. sacchariflorus</i>                   | JPN-2011-004 | 2             | 63.66 ABC  |
| <i>M. sinensis</i>                         | UI10-00024   | 1             | 62.08 ABC  |
| <i>M. sacchariflorus</i>                   | JPN-2011-004 | 1             | 61.20 ABC  |
| <i>M. sinensis</i>                         | PMS-285      | 1             | 58.94 ABC  |
| <i>M. sinensis</i>                         | PMS-007      | 2             | 56.27 ABC  |
| <i>M. sacchariflorus</i>                   | UI11-00033   | 1             | 55.11 ABC  |
| <i>M. sinensis</i>                         | PMS-285      | 2             | 54.60 ABC  |
| <i>M. sinensis</i>                         | PMS-347      | 1             | 52.45 ABCD |
| <i>M. sinensis</i>                         | UI10-00020   | 1             | 51.97 ABCD |
| <i>M. sinensis</i>                         | PMS-164      | 1             | 37.64ABCD  |
| <i>M. sinensis</i>                         | PMS-347      | 2             | 35.96 BCD  |
| <i>M. sinensis</i>                         | PMS-164      | 2             | 34.95 CD   |
| <i>M. sacchariflorus</i>                   | UI10-00008   | 2             | 15.46 D    |

† Stress level 1 represents the slight drought stress treatment and stress level 2 represents the severe drought stress treatment.

‡ Least squares means with the same letter are not significantly different ( $p < 0.05$ ).

**Supplemental Table S4-1.** Least squares means of drought stress index (DSI) values of stomatal conductance (gs) of *Miscanthus* genotypes in a screening experiment at Brigham Young University, Provo, Utah, USA

| Species                  | Accession  | Stress level† | DSI of gs |
|--------------------------|------------|---------------|-----------|
| <i>M. sinensis</i>       | PMS-164    | 2             | 223.67 A‡ |
| <i>M. floridulus</i>     | PI417947   | 1             | 205.71 A  |
| <i>M. sinensis</i>       | PMS-164    | 1             | 195.37 A  |
| <i>M. sinensis</i>       | UI10-00088 | 1             | 188.70 A  |
| <i>M. sinensis</i>       | PMS-007    | 1             | 181.12 A  |
| <i>M. sinensis</i>       | PMS-285    | 1             | 177.53 A  |
| <i>M. sinensis</i>       | PMS-007    | 2             | 117.85 A  |
| <i>M. floridulus</i>     | PI417947   | 2             | 109.87 A  |
| <i>M. sinensis</i>       | PMS-586    | 1             | 104.44 A  |
| <i>M. sinensis</i>       | PMS-285    | 2             | 96.88 A   |
| <i>M. sinensis</i>       | PMS-347    | 1             | 88.73 A   |
| <i>M. sacchariflorus</i> | UI11-00031 | 1             | 79.86 A   |
| <i>M. sinensis</i>       | UI10-00088 | 2             | 53.99 A   |
| <i>M. sinensis</i>       | PMS-014    | 1             | 53.59 A   |
| <i>M. sacchariflorus</i> | UI11-00031 | 2             | 31.96 A   |
| <i>M. sinensis</i>       | PMS-586    | 2             | 8.55 A    |
| <i>M. sinensis</i>       | PMS-014    | 2             | -4.02 A   |

† Stress level 1 represents the slight drought stress treatment and stress level 2 represents the severe drought stress treatment.

‡ Least squares means with the same letter are not significantly different ( $p < 0.05$ ).

**Supplemental Table S4-2.** Least squares means of drought stress index (DSI) values of stomatal conductance (gs) of *Miscanthus* genotypes in a precise-comparison experiment at Hokkaido University, Sapporo, Japan

| Species                                    | Accession    | Stress level† | DSI of gs |
|--------------------------------------------|--------------|---------------|-----------|
| <i>M. sinensis</i>                         | PMS-164      | 1             | 824.29 A‡ |
| <i>M. sinensis</i>                         | PMS-007      | 2             | 148.33 B  |
| <i>M. sinensis</i> var. <i>condensatus</i> | UI10-00015   | 2             | 105.52 B  |
| <i>M. sinensis</i>                         | UI10-00024   | 2             | 97.24 B   |
| <i>M. sacchariflorus</i>                   | UI11-00033   | 1             | 70.15 BC  |
| <i>M. sinensis</i>                         | PMS-285      | 2             | 43.53 BC  |
| <i>M. sinensis</i> var. <i>condensatus</i> | UI10-00015   | 1             | 27.49 BC  |
| <i>M. sinensis</i>                         | PMS-007      | 1             | 27.32 BC  |
| <i>M. sinensis</i>                         | PMS-164      | 2             | 26.25 BC  |
| <i>M. sinensis</i>                         | PMS-285      | 1             | 24.51 BC  |
| <i>M. sinensis</i>                         | UI10-00024   | 1             | 24.14 BC  |
| <i>M. sinensis</i>                         | PMS-347      | 1             | 15.97 BC  |
| <i>M. sacchariflorus</i>                   | JPN-2011-004 | 1             | 9.21 BC   |
| <i>M. sinensis</i>                         | UI10-00020   | 1             | 7.47 BC   |
| <i>M. sacchariflorus</i>                   | UI10-00008   | 1             | 5.49 BC   |
| <i>M. sacchariflorus</i>                   | JPN-2011-004 | 2             | -16.64 BC |
| <i>M. sinensis</i>                         | PMS-347      | 2             | -43.31 BC |



|                          |            |   |           |
|--------------------------|------------|---|-----------|
| <i>M. sacchariflorus</i> | UI10-00008 | 2 | -49.48 BC |
| <i>M. sinensis</i>       | UI10-00020 | 2 | -60.07 BC |
| <i>M. sacchariflorus</i> | UI11-00033 | 2 | -118.04 C |

---

†Stress level 1 represents the slight drought stress treatment and stress level 2 represents the severe drought stress treatment.

‡Least squares means with the same letter are not significantly different ( $p < 0.05$ ).

**Supplemental Table S5.** Photosynthetic rate (Pn) of each *Miscanthus* genotype under each soil water content level in a precise-comparison experiment at Hokkaido University, Sapporo, Japan

| Species                                       | Accession    | Pn ( $\mu\text{mol CO}_2 \bullet \text{m}^{-2} \bullet \text{s}^{-1}$ ) in each soil water content level |        |        |        |
|-----------------------------------------------|--------------|----------------------------------------------------------------------------------------------------------|--------|--------|--------|
|                                               |              | 30%                                                                                                      | 25%    | 20%    | 15%    |
| <i>M. sinensis</i>                            | PMS-007      | 13.608                                                                                                   | 9.684  | 7.475  | 0.258  |
| <i>M. sinensis</i>                            | PMS-285      | 15.008                                                                                                   | 7.761  | 7.457  | -0.158 |
| <i>M. sacchariflorus</i>                      | UI10-00008   | 13.844                                                                                                   | 1.160  | 2.281  | 0.308  |
| <i>M. sinensis</i>                            | UI10-00020   | 24.656                                                                                                   | 12.798 | 11.650 | 2.947  |
| <i>M. sinensis</i>                            | PMS-164      | 13.528                                                                                                   | 4.497  | 4.513  | -1.812 |
| <i>M. sinensis</i>                            | UI10-00024   | 17.117                                                                                                   | 10.304 | 9.341  | 1.526  |
| <i>M. sinensis</i>                            | PMS-347      | 11.377                                                                                                   | 5.666  | 4.212  | 0.352  |
| <i>M. sinensis</i> var.<br><i>condensatus</i> | UI10-00015   | 9.672                                                                                                    | 7.493  | 5.768  | -0.054 |
| <i>M. sacchariflorus</i>                      | JPN-2011-004 | 12.280                                                                                                   | 7.737  | 8.077  | 0.684  |
| <i>M. sacchariflorus</i>                      | UI11-00033   | 13.692                                                                                                   | 7.433  | 10.404 | 0.681  |

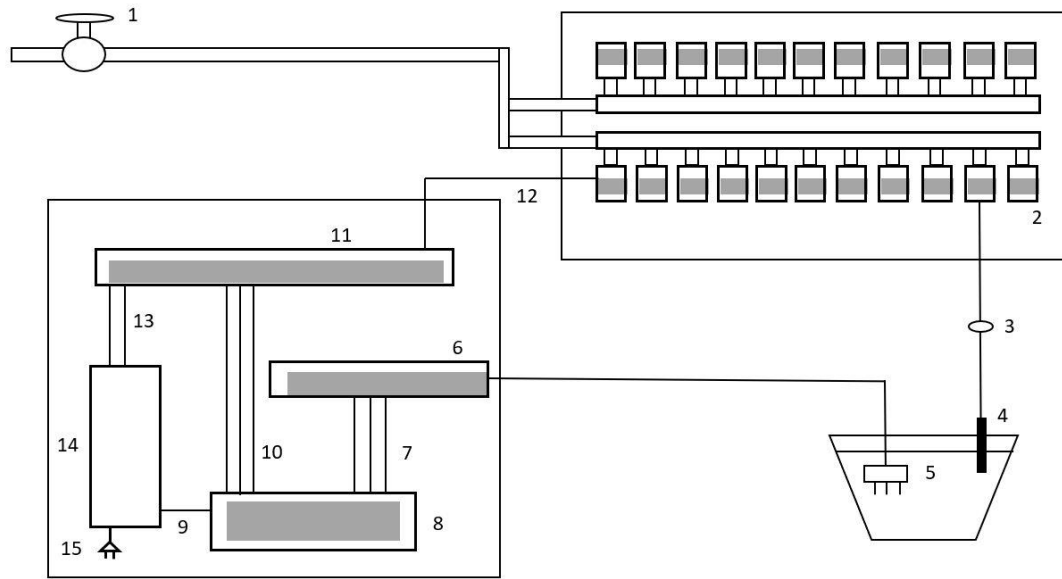

**Supplemental Figure S1** Simplified diagram showing various parts of the irrigation system, including the (1) water resource; (2) solenoid valve; (3) woodpecker emitter; (4) drip emitter; (5) soil moisture sensor; (6) thermocouple multiplexer; (7) connecting wires between CR6 datalogger and multiplexer; (8) CR6 datalogger; (9) power supply to CR6 datalogger; (10) connecting wires between CR6 datalogger and SDM 16 AC/DC relay controller; (11) SDM-CD16AC 16-Channel AC/DC relay controller; (12) power supply to solenoid valve; (13) power supply to SDM 16 AC/DC relay controller; (14) PS150 battery; and (15) main power supply. Only one pot is shown in detail (in the system, 30 pots can be independently irrigated).

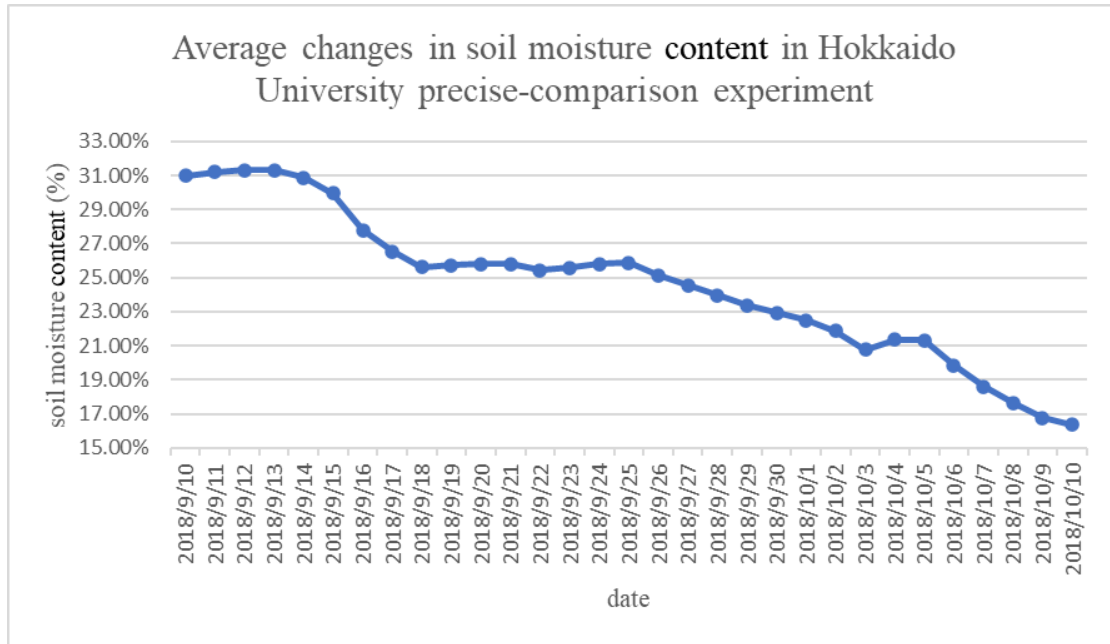

**Supplemental Figure S2** Average changes in soil moisture content controlled by the automated irrigation system in a precise-comparison experiment at Hokkaido University, Sapporo, Japan.
